# Supplementary material for: Two-dimensional ultrathin ZnCo2O4 nanosheets: general formation and lithium storage application
Source: Royal Society of Chemistry journal article supplement (doi:10.1039/c5ta00808e), 2015-01-01
Supplement: c5ta00808e1.pdf [file c5ta00808e1.pdf]

## Electronic Supplementary Information

### Two-Dimensional Ultrathin $\text{ZnCo}_2\text{O}_4$ Nanosheets: General Formation and Lithium Storage Application

Youqi Zhu, Chuanbao Cao\*, Junting Zhan, and Xingyan Xu

Research Center of Materials Science, Beijing Institute of Technology, Beijing 100081, China.

Fax: +86 10 68912001; Tel: +86 10 68913792; E-mail: cbcao@bit.edu.cn.

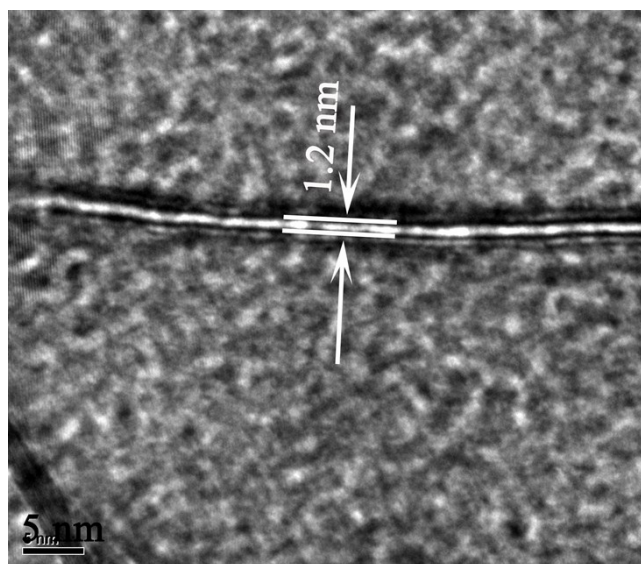

**Fig. S1.** A vertical HRTEM image of the  $\text{ZnCo}_2\text{O}_4$  nanosheets suggesting a thickness of about 1.2 nm.

**Table S1.** Comparison of the reported BET results for  $\text{ZnCo}_2\text{O}_4$  nanomaterials

| Nanostructure       | Specific surface area<br>( $\text{m}^2 \text{g}^{-1}$ ) | Pore volume<br>( $\text{cm}^3 \text{g}^{-1}$ ) | Ref.      |
|---------------------|---------------------------------------------------------|------------------------------------------------|-----------|
| Nanowires           | 154.7951                                                | 0.42                                           | 25        |
| Microspheres        | 26.8                                                    | 0.12                                           | 16        |
| Nanotubes           | 21.9                                                    | 0.146                                          | 18        |
| Hollow microspheres | 20.9                                                    | -- --                                          | 52        |
| Nanowires           | 68.86                                                   | -- --                                          | 17        |
| Twin-microspheres   | 7.33                                                    | 0.0449                                         | 47        |
| Nanoflakes          | 110.3                                                   | -- --                                          | 35        |
| Hollow powders      | 10                                                      | -- --                                          | 19        |
| Nanosheets          | 181.78                                                  | 0.49                                           | This work |

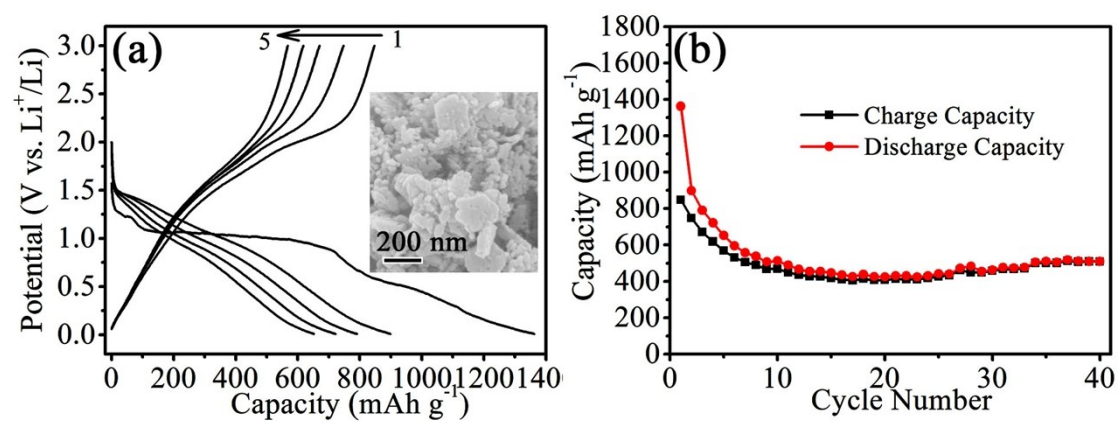

**Fig. S2.** (a) The first five discharge–charge voltage profiles and (b) cycling performance of ZnCo<sub>2</sub>O<sub>4</sub> nanoparticles at a constant current density of 200 mA g<sup>-1</sup> between 0.01 and 3.0 V.
